# Supplementary material for: The Luria-Nebraska Neuropsychological Battery Neuromotor Tasks: From Conventional to Image-Derived Measures
Source: MDPI journal article supplement (doi:10.3390/brainsci12060757), 2022-06-08
Supplement: s1 [file s1]

## SUPPLEMENTAL MATERIAL

### Title: The Luria-Nebraska Neuropsychological Battery neuromotor tasks: from conventional to image-derived measures

Daniele Corbo, Donatella Placidi, Roberto Gasparotti, Robert Wright, Donald R Smith, Roberto G Lucchini, Megan Horton, Elena Colicino

**Table S1. Pearson correlation coefficient between the conventional and the image-derived Luria-Nebraska Neuropsychological Battery (LNNB) task scores among 46 PHIME participants.** Task 1: the dominant hand clench, Task2: the finger-thumb touching with the dominant hand, Task 3: the non-dominant hand clench, Task 4: the finger-thumb touching with non-dominant hand, Task 5 alternative hand clench.

| LNNB tasks | rho  | 95% Confidence Interval |
|------------|------|-------------------------|
| Task 1     | 0.74 | (0.57; 0.85)            |
| Task 2     | 0.72 | (0.55; 0.84)            |
| Task 3     | 0.70 | (0.51; 0.82)            |
| Task 4     | 0.71 | (0.53; 0.83)            |
| Task 5     | 0.72 | (0.54; 0.83)            |

**Table S2. Area under the Receiver Operating Characteristic (ROC) curve (AUC) and 95% Confidence Interval (95%CI) of each Luria-Nebraska Neuropsychological Battery (LNNB) task, classifying participants with lower mobility (LNNB score < population mean levels).** Task 1: the dominant hand clench, Task2: the finger-thumb touching with the dominant hand, Task 3: the non-dominant hand clench, Task 4: the finger-thumb touching with non-dominant hand, Task 5 alternative hand clench.

| LNNB tasks | AUC  | 95%CI        | Specificity (70% sensitivity) |
|------------|------|--------------|-------------------------------|
| Task 1     | 0.73 | (0.6; 0.86)  | 0.71                          |
| Task 2     | 0.83 | (0.72; 0.94) | 0.83                          |
| Task 3     | 0.75 | (0.62; 0.88) | 0.71                          |
| Task 4     | 0.70 | (0.57; 0.83) | 0.63                          |
| Task 5     | 0.72 | (0.58; 0.85) | 0.67                          |

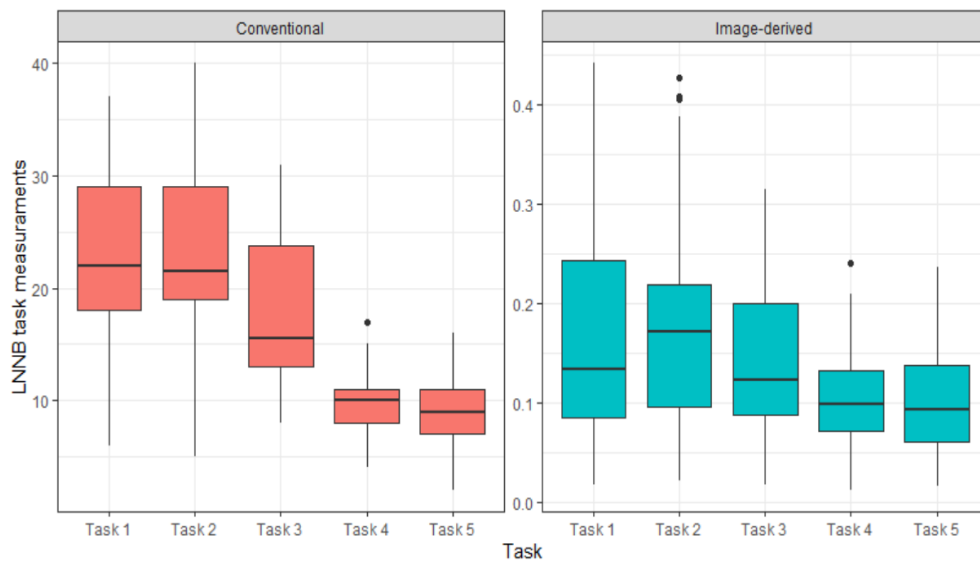

**Figure S1. Boxplots of the Luria-Nebraska Neuropsychological Battery (LNNB) task scores: a) conventional LNNB measurements; b) the image-derived LNNB measurements.**

Task 1: the dominant hand clench, Task2: the finger-thumb touching with the dominant hand, Task 3: the non-dominant hand clench, Task 4: the finger-thumb touching with non-dominant hand, Task 5 alternative hand clench.
